# Supplementary material for: Contrasting effects of bioturbation on metal toxicity of contaminated sediments results in misleading interpretation of the AVS–SEM metal-sulfide paradigm
Source: Royal Society of Chemistry journal article supplement (doi:10.1039/c8em00266e), 2018-01-01
Supplement: c8em00266e1.pdf [file c8em00266e1.pdf]

1 **Contrasting effects of bioturbation on metal toxicity of contaminated sediments results**  
2 **in misleading interpretation of the AVS-SEM metal-sulfide paradigm**

3

4 Timothy M. Remail<sup>a,b,d,\*</sup>, Naiyi Yin<sup>b,c</sup>, William W. Bennett<sup>a</sup>, Stuart L. Simpson<sup>b,\*</sup>, David T.  
5 Welsh<sup>a</sup>, Dianne F. Jolley<sup>d</sup>

6 **Supplementary Information**

7 **Methods**

8 **General methods**

9 All salts used for the preparation of solutions were of AR grade or higher. For physicochemical  
10 measurements, salinity was measured using a Mettler Toledo Seven2Go S3 conductivity meter fitted  
11 with an InLAB<sup>®</sup> 73X series conductivity probe; dissolved oxygen (DO) and pH were measured using  
12 WTW (Wissenschaftlich-Technische Werstätten) instruments (Multi 3410 with FDO<sup>®</sup> 925 probe and  
13 pH320 with SenTix 41 pH electrode). Dissolved ammonia was measured using a rapid test kit (API Fish  
14 Care, LR8600). All probes were pre-calibrated using the manufacturer's instructions.

15

16 *Sediment characterisation*

17 Total recoverable metals (TRM) were determined after low-pressure microwave-assisted (MARS 5,  
18 CEM) aqua regia digestion (3:1 HNO<sub>3</sub>: HCl). Total organic carbon (TOC) analysis was determined as CO<sub>2</sub>  
19 evolution following a prescribed method.<sup>1</sup> Dried, ground sediment samples were acid-treated to  
20 remove inorganic carbonates followed by high temperature combustion in an oxygen atmosphere  
21 (Leco TruMAC instrument) followed by infrared detection. Frozen sediment mini-cores were extruded  
22 within a nitrogen-filled glove box. Sections were taken from the surface (~0.5 cm from the top) and  
23 at depth (0.5-1 cm from the bottom) and three replicate core samples for each fraction homogenized  
24 before being analyzed for AVS and SEM.<sup>2</sup>

25

---

26 (1) Matejovic I. Determination of Carbon and Nitrogen in samples of various soils by the dry combustion. *Comm. Soil Sci.*  
27 *Plant Anal.* 1997, 28, 1499-1511.

28 (2) Simpson, S. L. A rapid screening method for acid-volatile sulfide in sediments. *Environ. Toxicol. Chem.* 2001, 20 (12), 2657–  
29 2661.

30

31

## 32 Sulfidization procedure

33 Sulfidised sediment was prepared synthetically by the addition of a neutralized sulfide stock solution  
34 in molar excess to the sediment SEM concentration to convert the reactive iron and metals into their  
35 respective monosulfides (as shown in Equation S1).

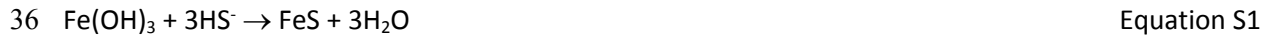

37 A neutralized sulfide solution was used because a sulfide solution prepared using just  $\text{Na}_2\text{S}\cdot 9\text{H}_2\text{O}$   
38 resulted in a highly alkaline solution due to the excess of hydroxides produced during the reduction of  
39  $\text{Fe(OH)}_3$  (Equation S2).

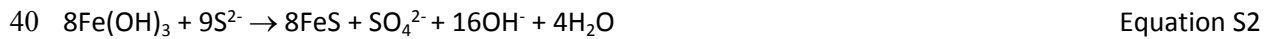

41 Sulfide stock solutions ( $\text{Na}_2\text{S}\cdot 9\text{H}_2\text{O}$  (Sigma Aldrich) in deoxygenated deionized water) were neutralised  
42 with  $2 \text{ mol L}^{-1}$  of  $\text{H}_2\text{SO}_4$  (BDH) until a pH of 7.3 was reached. In a bucket purged with  $\text{N}_2$ , neutralised  
43 (1.5 L,  $200 \text{ mmol L}^{-1}$ ) sulfide solution was mixed into 10 kg wet weight sediment and the bucket sealed  
44 for 10 days, yielding a total AVS of  $16 \pm 0.1 \text{ mmol kg}^{-1}$  dry weight. This was repeated using a second  
45 neutralised sulfide solution ( $150 \text{ mmol L}^{-1}$ , yielding an AVS of  $16 \text{ mmol kg}^{-1}$  dry weight after 6 days);  
46 and then a third time using 1.0 L of  $200 \text{ mmol L}^{-1}$  sulfide solution and after 5 days, yielding an AVS of  
47  $33 \pm 0.7 \text{ mmol kg}^{-1}$  dry weight. The overlying water was removed (3.0 L) and the sediment was then  
48 washed with 1.0 L of deoxygenated seawater. To ensure consistency with sediment treatments, the  
49 reference sediment and non-sulfidized metal-contaminated sediments were washed with 2.5 L of  
50 deionised water then covered with 1.0 L of deoxygenated seawater a week prior to use.

51 **Figure S1.** Timeline for the toxicity testing phase

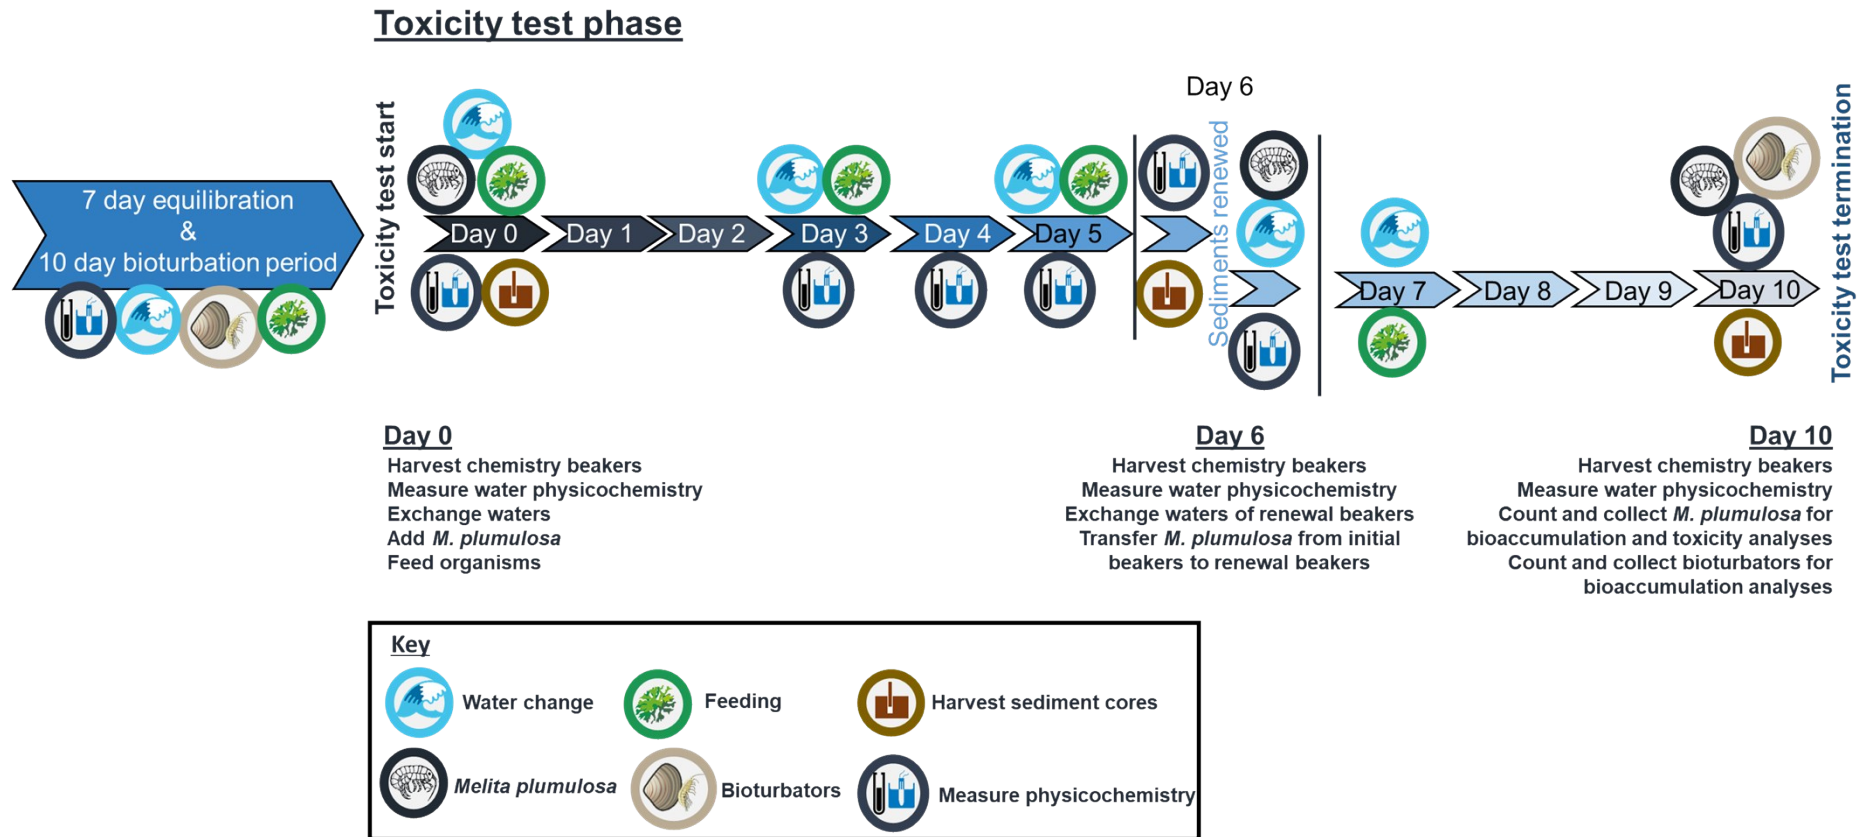

52

53

# Results

**Table S1. Final physicochemical properties of surficial sediments for the  $AVS_{Low}$  mesocosms**

| Treatment                                     | Day       | Simultaneously extractable metals (SEM) (1M HCl –extractable; mg kg <sup>-1</sup> or % for Fe, dry weight) |          |           |           |           |           |           |           | SEM       | AVS       | ΣSEM-AVS<br>(μmol g <sup>-1</sup> ) | ΣSEM-AVS/<br>f <sub>oc</sub> |
|-----------------------------------------------|-----------|------------------------------------------------------------------------------------------------------------|----------|-----------|-----------|-----------|-----------|-----------|-----------|-----------|-----------|-------------------------------------|------------------------------|
|                                               |           | Fe                                                                                                         | Mn       | As        | Cu        | Ni        | Pb        | V         | Zn        |           |           |                                     |                              |
| <b>No <math>AVS_{Low}</math></b>              | <b>10</b> | 0.5                                                                                                        | 76 ± 24  | 10 ± 2.9  | 165 ± 45  | 2.5 ± 1.0 | 310 ± 103 | 19 ± 6.4  | 438 ± 131 | 18 ± 3.1  | 0.6 ± 0.3 | 17 ± 2.7                            | 3.1 ± 0.5                    |
|                                               | <b>0</b>  | 0.5                                                                                                        | 51 ± 32  | 6.8 ± 4.6 | 108 ± 65  | 1.2 ± 0.9 | 199 ± 153 | 13 ± 10   | 286 ± 208 | 7.1 ± 4.9 | 0.7 ± 0.7 | 6.4 ± 4.2                           | 1.2 ± 0.8                    |
| <b>Static <math>AVS_{Low}</math></b>          | <b>6</b>  | 0.3                                                                                                        | 39 ± 11  | 4.9 ± 1.4 | 88 ± 25   | 1.5 ± 0.5 | 138 ± 43  | 9.0 ± 3.0 | 219 ± 61  | 5.4 ± 1.5 | 0.3 ± 0.1 | 5.1 ± 1.4                           | 0.9 ± 0.3                    |
|                                               | <b>10</b> | 5.5                                                                                                        | 76 ± 24  | 10 ± 2.9  | 165 ± 45  | 2.5 ± 1.0 | 310 ± 103 | 19 ± 6.0  | 483 ± 131 | 18 ± 2.3  | 0.8 ± 0.2 | 17 ± 2.1                            | 3.1 ± 0.4                    |
| <b>Bioturbated<br/><math>AVS_{Low}</math></b> | <b>0</b>  | 0.4                                                                                                        | 47 ± 4.0 | 7.1 ± 1.7 | 105 ± 6.0 | 1.4 ± 0.3 | 190 ± 7.1 | 13 ± 0.7  | 286 ± 14  | 7.0 ± 0.3 | 0.3 ± 0.3 | 6.6 ± 0.5                           | 1.2 ± 0.1                    |
|                                               | <b>6</b>  | 0.4                                                                                                        | 69 ± 26  | 11 ± 3.6  | 172 ± 64  | 3.2 ± 1.5 | 275 ± 100 | 19 ± 7.4  | 433 ± 159 | 11 ± 3.9  | 0.7 ± 0.3 | 10 ± 3.7                            | 1.9 ± 0.7                    |
|                                               | <b>10</b> | 1                                                                                                          | 154 ± 15 | 15 ± 1.3  | 343 ± 28  | 5.3 ± 0.9 | 664 ± 63  | 37 ± 4.9  | 865 ± 88  | 22 ± 2.1  | 0.5 ± 0.1 | 21 ± 2.0                            | 3.9 ± 0.4                    |

For all results, n= 3 (mean ± SD). ΣSEM = 1 M HCl extractable metals. AVS = acid-volatile sulfide. f<sub>oc</sub> = fraction of organic carbon, where the ΣSEM-AVS fraction is normalised by the fraction of organic carbon.

**Table S2. Final physicochemical properties of deeper sediments for the AVS<sub>Low</sub> mesocosms**

| Treatment                            | Day       | Simultaneously extractable metals (SEM) (1M HCl –extractable; mg kg <sup>-1</sup> or % for Fe, dry weight) |           |           |          |           |           |           |           | SEM       | AVS       | ΣSEM-AVS<br>(μmol g <sup>-1</sup> ) | ΣSEM-AVS/<br>f <sub>OC</sub> |
|--------------------------------------|-----------|------------------------------------------------------------------------------------------------------------|-----------|-----------|----------|-----------|-----------|-----------|-----------|-----------|-----------|-------------------------------------|------------------------------|
|                                      |           | Fe                                                                                                         | Mn        | As        | Cu       | Ni        | Pb        | V         | Zn        |           |           |                                     |                              |
| <b>No AVS<sub>Low</sub></b>          | <b>10</b> | 0.5                                                                                                        | 59 ± 20   | 6.4 ± 2.1 | 83 ± 26  | 1.8 ± 0.4 | 228 ± 75  | 15 ± 5.0  | 337 ± 110 | 7.8 ± 3.0 | 0.2 ± 0.1 | 7.6 ± 2.9                           | 1.4 ± 0.5                    |
|                                      | <b>0</b>  | 0.5                                                                                                        | 27 ± 2.0  | 3.0 ± 0.8 | 48 ± 10  | 0.8 ± 0.2 | 108 ± 9.0 | 7.0 ± 0.2 | 163 ± 13  | 3.8 ± 0.4 | 0.4 ± 0.0 | 3.4 ± 0.4                           | 0.6 ± 0.1                    |
| <b>Static AVS<sub>Low</sub></b>      | <b>6</b>  | 0.4                                                                                                        | 93 ± 87   | 5.1 ± 0.4 | 89 ± 18  | 1.6 ± 0.5 | 162 ± 37  | 11 ± 3.0  | 253 ± 64  | 6.1 ± 1.4 | 0.3 ± 0.1 | 5.8 ± 1.4                           | 1.1 ± 0.3                    |
|                                      | <b>10</b> | 8.5                                                                                                        | 124 ± 15  | 14 ± 0.8  | 327 ± 36 | 4.2 ± 0.6 | 507 ± 57  | 28 ± 4.0  | 674 ± 86  | 18 ± 5.0  | 0.9 ± 0.8 | 17 ± 5.8                            | 3.1 ± 1.1                    |
| <b>Bioturbated AVS<sub>Low</sub></b> | <b>0</b>  | 0.3                                                                                                        | 43 ± 15   | 5.8 ± 1.4 | 93 ± 34  | 1.4 ± 0.6 | 189 ± 68  | 12 ± 4.5  | 277 ± 107 | 6.6 ± 2.5 | 0.5 ± 0.2 | 6.1 ± 2.3                           | 1.1 ± 0.4                    |
|                                      | <b>6</b>  | 0.3                                                                                                        | 69 ± 11   | 9.2 ± 3.7 | 164 ± 44 | 3.3 ± 1.1 | 282 ± 42  | 22 ± 1.2  | 487 ± 35  | 11 ± 1.4  | 0.9 ± 0.6 | 11 ± 2.1                            | 2.0 ± 0.4                    |
|                                      | <b>10</b> | 8.4                                                                                                        | 126 ± 9.0 | 11 ± 0.3  | 263 ± 35 | 4.4 ± 0.3 | 562 ± 45  | 30 ± 2.0  | 722 ± 55  | 18 ± 1.6  | 0.4 ± 0.1 | 18 ± 1.6                            | 3.3 ± 0.3                    |

For all results, n= 3 (mean ± SD). ΣSEM = 1 M HCl extractable metals. AVS = acid-volatile sulfide. f<sub>OC</sub> = fraction of organic carbon, where the ΣSEM-AVS fraction is normalised by the fraction of organic carbon.

55

56

**Table S3. Final physicochemical properties of surficial sediments for the  $AVS_{High}$  mesocosms**

| Treatment                                      | Day       | Simultaneously extractable metals (SEM) (1M HCl –extractable; mg kg <sup>-1</sup> or % for Fe, dry weight) |          |           |          |           |           |           |           | SEM       | AVS       | ΣSEM-AVS<br>(μmol g <sup>-1</sup> ) | Σ(ΣSEM-AVS)/<br>f <sub>oc</sub> |
|------------------------------------------------|-----------|------------------------------------------------------------------------------------------------------------|----------|-----------|----------|-----------|-----------|-----------|-----------|-----------|-----------|-------------------------------------|---------------------------------|
|                                                |           | Fe                                                                                                         | Mn       | As        | Cu       | Ni        | Pb        | V         | Zn        |           |           |                                     |                                 |
| <b>No <math>AVS_{High}</math></b>              | <b>10</b> | 0.4                                                                                                        | 39 ± 1.8 | 3.3 ± 0.3 | 49 ± 3.0 | 0.8 ± 0.2 | 105 ± 9.9 | 11 ± 1.2  | 185 ± 13  | 4.1 ± 0.3 | 2.3 ± 0.4 | 2.6 ± 0.7                           | 1.4 ± 0.4                       |
|                                                | <b>0</b>  | 0.4                                                                                                        | 27 ± 5.7 | 2.7 ± 0.7 | 35 ± 7.1 | 0.7 ± 0.1 | 91 ± 17   | 9.6 ± 1.5 | 168 ± 25  | 3.6 ± 0.6 | 4.7 ± 3.0 | -1.1 ± 3.5                          | -0.6 ± 1.8                      |
| <b>Static <math>AVS_{High}</math></b>          | <b>6</b>  | 0.8                                                                                                        | 66 ± 4.3 | 6.5 ± 1.3 | 97 ± 15  | 2.2 ± 0.5 | 198 ± 36  | 20 ± 4.1  | 378 ± 71  | 8.3 ± 1.5 | 6.5 ± 5.3 | 1.8 ± 4.1                           | 0.9 ± 2.2                       |
|                                                | <b>10</b> | 0.5                                                                                                        | 38 ± 16  | 3.9 ± 0.9 | 58 ± 22  | 1.3 ± 0.8 | 127 ± 57  | 11 ± 4.9  | 226 ± 104 | 5.0 ± 2.2 | 1.0 ± 0.5 | 3.9 ± 1.7                           | 2.1 ± 0.9                       |
| <b>Bioturbated<br/><math>AVS_{High}</math></b> | <b>0</b>  | 0.6                                                                                                        | 37 ± 0.9 | 6.5 ± 1.3 | 70 ± 19  | 1.7 ± 0.9 | 154 ± 30  | 16 ± 3.3  | 275 ± 57  | 6.1 ± 1.3 | 6.0 ± 2.1 | 0.1 ± 1.0                           | 0.05 ± 0.5                      |
|                                                | <b>6</b>  | 0.3                                                                                                        | 22 ± 4.6 | 2.8 ± 0.8 | 47 ± 12  | 1.0 ± 0.3 | 96 ± 21   | 9.7 ± 2.2 | 117 ± 8.2 | 3.9 ± 0.9 | 2.8 ± 1.1 | 1.2 ± 0.3                           | 0.6 ± 0.2                       |
|                                                | <b>10</b> | 0.6                                                                                                        | 37 ± 5.7 | 3.0 ± 0.1 | 63 ± 9.2 | 1.7 ± 0.3 | 166 ± 24  | 16 ± 3.0  | 295 ± 37  | 6.3 ± 0.8 | 2.8 ± 1.2 | 3.5 ± 0.7                           | 1.8 ± 0.4                       |

For all results, n= 3 (mean ± SD). ΣSEM = 1 M HCl extractable metals. AVS = acid-volatile sulfide. f<sub>oc</sub> = fraction of organic carbon, where the ΣSEM-AVS fraction is normalised by the fraction of organic carbon.

57

58

**Table S4. Final physicochemical properties of deeper sediments for AVS<sub>High</sub> mesocosms**

| Treatment                             | Day       | Simultaneously extractable metals (SEM) (1M HCl –extractable; mg kg <sup>-1</sup> or % for Fe, dry weight) |          |           |          |            |           |           |          | SEM       | AVS       | ΣSEM-AVS<br>(μmol g <sup>-1</sup> ) | Σ(ΣSEM-AVS)/<br>f <sub>oc</sub> |
|---------------------------------------|-----------|------------------------------------------------------------------------------------------------------------|----------|-----------|----------|------------|-----------|-----------|----------|-----------|-----------|-------------------------------------|---------------------------------|
|                                       |           | Fe                                                                                                         | Mn       | As        | Cu       | Ni         | Pb        | V         | Zn       |           |           |                                     |                                 |
| <b>No AVS<sub>High</sub></b>          | <b>10</b> | 0.4                                                                                                        | 30 ± 1.5 | 1.1 ± 1.0 | 26 ± 6.7 | 0.8 ± 0.2  | 111 ± 7.5 | 13 ± 0.4  | 211 ± 14 | 4.2 ± 0.3 | 25 ± 6.4  | -20 ± 6.2                           | -11 ± 3.3                       |
|                                       | <b>0</b>  | 0.5                                                                                                        | 31 ± 7.8 | 1.6 ± 0.5 | 31 ± 7.7 | 1.3 ± 0.2  | 108 ± 18  | 12 ± 2.8  | 225 ± 50 | 4.5 ± 0.9 | 7.4 ± 4.4 | -2.9 ± 3.9                          | -1.5 ± 2.0                      |
| <b>Static AVS<sub>High</sub></b>      | <b>6</b>  | 0.6                                                                                                        | 44 ± 11  | 2.9 ± 1.4 | 42 ± 15  | 1.7 ± 0.3  | 156 ± 46  | 17 ± 4.6  | 316 ± 98 | 6.3 ± 2.0 | 14 ± 4.2  | -7.2 ± 2.3                          | -3.8 ± 1.2                      |
|                                       | <b>10</b> | 0.6                                                                                                        | 39 ± 1.1 | 1.8 ± 0.3 | 34 ± 7.6 | 1.7 ± 0.1  | 149 ± 6.2 | 16 ± 0.2  | 302 ± 10 | 5.9 ± 0.2 | 19 ± 2.0  | -12 ± 2.3                           | -6.3 ± 1.2                      |
| <b>Bioturbated AVS<sub>High</sub></b> | <b>0</b>  | 0.5                                                                                                        | 28 ± 2.8 | 2.9 ± 1.4 | 38 ± 3.9 | 0.9 ± 0.2  | 112 ± 7.8 | 12 ± 0.6  | 211 ± 20 | 4.4 ± 0.3 | 7.0 ± 1.9 | -2.6 ± 1.7                          | -1.4 ± 0.9                      |
|                                       | <b>6</b>  | 0.3                                                                                                        | 19 ± 1.6 | 2.4 ± 0.6 | 40 ± 11  | 0.7 ± 0.1  | 81 ± 14   | 7.4 ± 2.2 | 137 ± 19 | 3.1 ± 0.4 | 2.3 ± 0.5 | 4.1 ± 1.3                           | 2.2 ± 0.7                       |
|                                       | <b>10</b> | 0.5                                                                                                        | 30 ± 3.1 | 2.8 ± 1.3 | 43 ± 9.4 | 1.5 ± 0.04 | 126 ± 16  | 12 ± 1.1  | 233 ± 24 | 4.9 ± 0.6 | 3.3 ± 0.6 | 1.6 ± 0.3                           | 0.8 ± 0.2                       |

For all results, n= 3 (mean ± SD). ΣSEM = 1 M HCl extractable metals. AVS = acid-volatile sulfide. f<sub>oc</sub> = fraction of organic carbon, where the ΣSEM-AVS fraction is normalised by the fraction of organic carbon.

59

60

61

**Table S5. Water chemistry and dissolved metal concentrations during the bioturbation (Bio) and Toxicity (Tox) test phases.**

| Sediment                        | Dissolved metal concentrations (0.45 µm-filtered, µg L <sup>-1</sup> ) |           |           |            |                 |            |            |           | Mean physicochemical Parameters |          |           |                       |           |
|---------------------------------|------------------------------------------------------------------------|-----------|-----------|------------|-----------------|------------|------------|-----------|---------------------------------|----------|-----------|-----------------------|-----------|
|                                 | Fe                                                                     | Mn        | As        | Cd         | Cr              | Cu         | Pb         | Zn        | DO (%)                          | T (°C)   | pH        | NH <sub>3</sub> (ppm) | Salinity* |
| <i>Reference</i>                |                                                                        |           |           |            |                 |            |            |           |                                 |          |           |                       |           |
| <i>static</i> <sup>Tox</sup>    | 5.8 ± 2.1                                                              | 2.1 ± 3.4 | 0.8 ± 0.2 | 0.1 ± 0.02 | 0.3 ± 0.1       | 2.3 ± 0.4* | 0.1 ± 0.03 | 7.8 ± 5.3 | 97 ± 2.9                        | 20 ± 0.5 | 7.8 ± 0.3 | 0.3 ± 0.6             | 32 ± 0.9  |
| <i>bioturb.</i> <sup>Bio</sup>  | 3.8 ± 1.4                                                              | 2.9 ± 2.4 | 0.7 ± 0.0 | 0.1 ± 0.1  | <0.2            | 1.1 ± 0.1  | 0.1 ± 0.1  | 8.5 ± 3.1 | 98 ± 1.3                        | 20 ± 0.3 | 7.9 ± 0.1 | 1.2 ± 0.7             | 32 ± 0.6  |
| <i>bioturb.</i> <sup>Tox</sup>  | 42 ± 105                                                               | 79 ± 76   | 2.1 ± 0.5 | <0.1       | <0.2            | 1.8 ± 1.9* | 0.2 ± 0.2  | 4.8 ± 4.8 | 99 ± 0.6                        | 21 ± 0.6 | 7.9 ± 0.1 | 0.0 ± 0.1             | 32 ± 0.6  |
| <i>AVS<sub>Low</sub></i>        |                                                                        |           |           |            |                 |            |            |           |                                 |          |           |                       |           |
| <i>static</i> <sup>NO</sup>     | 2.5 ± 0.5                                                              | 0.1 ± 0.2 | 2.3 ± 0.5 | 0.2 ± 0.1  | 0.4 ± 0.1       | 4.7 ± 1.1* | 1.1 ± 0.3  | 15 ± 1.4  | 97 ± 1.2                        | 20 ± 0.3 | 7.9 ± 0.1 | 0.1 ± 0.2             | 32 ± 0.8  |
| <i>static</i> <sup>Tox</sup>    | 2.1 ± 0.9                                                              | 0.1 ± 0.1 | 2.2 ± 0.4 | 0.2 ± 0.1  | 0.3 ± 0.1       | 6.9 ± 2.3* | 1.5 ± 0.5  | 19 ± 1.8  | 97 ± 2.4                        | 20 ± 0.6 | 8.0 ± 0.2 | 0.0 ± 0.0             | 32 ± 0.6  |
| <i>bioturb.</i> <sup>Bio</sup>  | 2.8 ± 1.9                                                              | 17 ± 15   | 2.8 ± 0.5 | 0.2 ± 0.1  | <0.2            | 5.3 ± 2.2* | 3.2 ± 0.6  | 18 ± 4.9  | 97 ± 1.7                        | 20 ± 0.5 | 7.9 ± 0.2 | 0.7 ± 0.6             | 32 ± 0.6  |
| <i>bioturb.</i> <sup>Tox</sup>  | 3.3 ± 0.5                                                              | 85 ± 28   | 5.1 ± 1.0 | 0.2 ± 0.1  | <0.2            | 5.7 ± 1.6* | 3.7 ± 1.5  | 12 ± 2.0  | 99 ± 0.7                        | 21 ± 0.3 | 8.0 ± 0.1 | 0.6 ± 0.3             | 31 ± 0.4  |
| <i>AVS<sub>High</sub></i>       |                                                                        |           |           |            |                 |            |            |           |                                 |          |           |                       |           |
| <i>static</i> <sup>NO</sup>     | 2.9 ± 0.9                                                              | 0.2 ± 0.2 | 1.2 ± 0.5 | <0.1       | <0.2            | 1.5 ± 0.3* | 0.1 ± 0.1  | 1.5 ± 0.5 | 96 ± 3.5                        | 20 ± 0.4 | 8.2 ± 0.1 | 0.0 ± 0.1             | 32 ± 0.5  |
| <i>static</i> <sup>Tox</sup>    | 1.9 ± 0.4                                                              | 6.2 ± 19  | 1.9 ± 0.4 | <0.1       | <0.2            | 3.2 ± 1.2* | 0.2 ± 0.1  | 1.8 ± 0.8 | 94 ± 4.9                        | 21 ± 0.4 | 8.2 ± 0.1 | 0.2 ± 0.3             | 32 ± 0.4  |
| <i>bioturb.</i> <sup>Bio</sup>  | 7.6 ± 5.6                                                              | 123 ± 112 | 5.8 ± 3.3 | <0.1       | <0.2            | 1.0 ± 0.9  | 0.3 ± 0.1  | 3.5 ± 2.9 | 94 ± 5.0                        | 20 ± 0.4 | 8.2 ± 0.1 | 1.3 ± 0.7             | 32 ± 0.4  |
| <i>bioturb.</i> <sup>Tox</sup>  | 12 ± 14                                                                | 207 ± 76  | 3.4 ± 1.4 | <0.1       | <0.2            | 0.4 ± 0.3  | 0.4 ± 0.1  | 1.7 ± 0.7 | 97 ± 1.0                        | 21 ± 0.4 | 8.0 ± 0.1 | 1.0 ± 0.6             | 32 ± 0.7  |
| <b>WQGV (µg L<sup>-1</sup>)</b> |                                                                        | 750       | NV        | 5.5        | 4.4<br>(Cr(VI)) | 1.3        | 4.4        | 100       |                                 |          |           |                       |           |

All data are mean ± SD (n= 12). The Water Quality Guideline values (WQGV) are reported at 95% species protection level. WQGVs for Cd, Cu, Pb, V and Zn were from ANZECC/ARMCANZ (2000). • WQGV for Mn is the recommended value currently under review Golding et al. (2016). \* exceeded the WQGV. •salinity measured on the practical salinity scale (psu).



**Table S6.** Survival and sub-lethal toxicity data from the 10-day *M. plumulosa* bioassay

| Sediment & treatment      | Survival (% of control) |           |           |             |           |           | Reproduction (% of control) |            |                      |
|---------------------------|-------------------------|-----------|-----------|-------------|-----------|-----------|-----------------------------|------------|----------------------|
|                           | Renewal                 |           |           | Termination |           |           | Average                     | Per female | Per surviving female |
|                           | Males                   | Females   | Total     | Males       | Females   | Total     |                             |            |                      |
| <i>Reference</i>          |                         |           |           |             |           |           |                             |            |                      |
| <i>static</i>             | 89 ± 5.6                | 89 ± 5.6  | 89 ± 2.8  | 89 ± 5.6    | 83 ± 9.6  | 86 ± 5.6  | 100 ± 8.6                   | 100 ± 8.6  | 100 ± 19             |
| <i>bioturb.</i>           | 94 ± 5.6                | 94 ± 5.6  | 94 ± 2.8  | 89 ± 5.6    | 94 ± 5.6  | 92 ± 0.01 | 94 ± 22                     | 94 ± 22    | 78 ± 15              |
| <i>AVS<sub>Low</sub></i>  |                         |           |           |             |           |           |                             |            |                      |
| <i>static</i>             | 106 ± 11                | 94 ± 11   | 100 ± 3.1 | 100 ± 13    | 93 ± 13   | 97 ± 0.01 | 4.1 ± 3.1                   | 4.1 ± 3.1  | 4.6 ± 3.8            |
| <i>bioturb.</i>           | 106 ± 6.2               | 88 ± 6.2  | 94 ± 5.4  | 94 ± 11     | 87 ± 6.7  | 90 ± 6.5  | 46 ± 7.5                    | 46 ± 7.5   | 52 ± 11              |
| <i>AVS<sub>High</sub></i> |                         |           |           |             |           |           |                             |            |                      |
| <i>static</i>             | 100 ± 6.2               | 106 ± 6.2 | 109 ± 3.1 | 94 ± 11     | 93 ± 26.7 | 94 ± 18   | 57 ± 14                     | 57 ± 14    | 69 ± 21              |
| <i>bioturb.</i>           | 75 ± 0.01               | 69 ± 6.2  | 72 ± 3.1  | 81 ± 6.3    | 73 ± 6.7  | 77 ± 5.6  | 23 ± 4.4                    | 23 ± 4.4   | 31 ± 8.2             |

All data are expressed as mean ± standard error, where n=3.

63

64

**Table S7.** Organism bioaccumulation data following 10-day (*M. plumulosa*) and 27-day (*V. australiensis* and *T. deltoidalis*) exposures

| Mesocosm                  | Organism            | Metal accumulation ( $\mu\text{g/g dw}$ ) |               |               |               |               |               | Toxicity Data                      |                                 |
|---------------------------|---------------------|-------------------------------------------|---------------|---------------|---------------|---------------|---------------|------------------------------------|---------------------------------|
|                           |                     | As                                        | Cr            | Cu            | Ni            | Pb            | Zn            | Number of organisms digested<br>N# | Average Survival<br>(% control) |
| <i>Reference</i>          |                     |                                           |               |               |               |               |               |                                    |                                 |
| <i>static</i>             | <i>Melita</i>       | 10 $\pm$ 5.1                              | 1.8 $\pm$ 1.4 | 72 $\pm$ 16   | 4.0 $\pm$ 0.3 | 6.1 $\pm$ 3.5 | 85 $\pm$ 26   | 6,5,5                              | 89 $\pm$ 5.6                    |
|                           | <i>Melita</i>       | 13 $\pm$ 3.0                              | 2.5 $\pm$ 0.5 | 113 $\pm$ 32  | 5.1 $\pm$ 0.8 | 11 $\pm$ 1.7  | 163 $\pm$ 24  | 6,5,5                              | 89 $\pm$ 5.6                    |
| <i>bioturb.</i>           | <i>Victoriopisa</i> | 13 $\pm$ 5.1                              | 0.7 $\pm$ 0.4 | 213 $\pm$ 99  | 1.4 $\pm$ 0.6 | 5.6 $\pm$ 2.7 | 137 $\pm$ 48  | 4,4,2                              | 83 $\pm$ 17                     |
|                           | <i>Tellina</i>      | 15 $\pm$ 1.8                              | 2.6 $\pm$ 0.8 | 173 $\pm$ 51  | 3.9 $\pm$ 0.8 | 37 $\pm$ 6.0  | 383 $\pm$ 35  | 6,6,6                              | 100 $\pm$ 0.0                   |
| <i>AVS<sub>Low</sub></i>  |                     |                                           |               |               |               |               |               |                                    |                                 |
| <i>static</i>             | <i>Melita</i>       | 9.1 $\pm$ 3.1                             | 3.2 $\pm$ 0.6 | 159 $\pm$ 7.4 | 16 $\pm$ 2.6  | 8.2 $\pm$ 1.5 | 145 $\pm$ 42  | 6.4.6                              | 100 $\pm$ 13                    |
|                           | <i>Melita</i>       | 9.1 $\pm$ 2.0                             | 4.2 $\pm$ 1.2 | 100 $\pm$ 15  | 34 $\pm$ 10   | 5.2 $\pm$ 3.9 | 155 $\pm$ 60  | 5.6.4                              | 94 $\pm$ 11                     |
| <i>bioturb.</i>           | <i>Victoriopisa</i> | 8.8 $\pm$ 1.9                             | 1.4 $\pm$ 0.3 | 172 $\pm$ 7.5 | 1.0 $\pm$ 0.2 | 29 $\pm$ 8.8  | 107 $\pm$ 10  | 4,4,2                              | 100 $\pm$ 20                    |
|                           | <i>Tellina</i>      | 21 $\pm$ 3.3                              | 7.8 $\pm$ 2.4 | 335 $\pm$ 126 | 5.8 $\pm$ 1.3 | 123 $\pm$ 30  | 614 $\pm$ 161 | 6,6,6                              | 100 $\pm$ 0.0                   |
| <i>AVS<sub>High</sub></i> |                     |                                           |               |               |               |               |               |                                    |                                 |
| <i>static</i>             | <i>Melita</i>       | 7.8 $\pm$ 3.2                             | 1.8 $\pm$ 0.2 | 112 $\pm$ 18  | 8.1 $\pm$ 1.3 | 3.2 $\pm$ 0.6 | 113 $\pm$ 3.7 | 5.6.4                              | 94 $\pm$ 11                     |
|                           | <i>Melita</i>       | 9.9 $\pm$ 3.6                             | 4.6 $\pm$ 2.4 | 94 $\pm$ 21   | 25 $\pm$ 8.1  | 6.7 $\pm$ 2.8 | 264 $\pm$ 30  | 5.4.4                              | 81 $\pm$ 6.3                    |
| <i>bioturb.</i>           | <i>Victoriopisa</i> | 12 $\pm$ 3.8                              | 0.9 $\pm$ 0.3 | 148 $\pm$ 24  | 1.0 $\pm$ 0.4 | 7.4 $\pm$ 2.9 | 117 $\pm$ 38  | 4,4,4                              | 120 $\pm$ 0.0                   |
|                           | <i>Tellina</i>      | 19 $\pm$ 4.0                              | 5.7 $\pm$ 2.6 | 290 $\pm$ 51  | 5.3 $\pm$ 1.3 | 87 $\pm$ 31   | 585 $\pm$ 68  | 6,6,6                              | 100 $\pm$ 10                    |

*Melita* = amphipod *Melita plumulosa* (males only), *Victoriopisa* = amphipod *Victoriopisa australiensis*, = bivalve *Tellina deltoidalis*. Bioaccumulated concentrations are based on dry weight of tissue. N= 3, mean  $\pm$  SE.

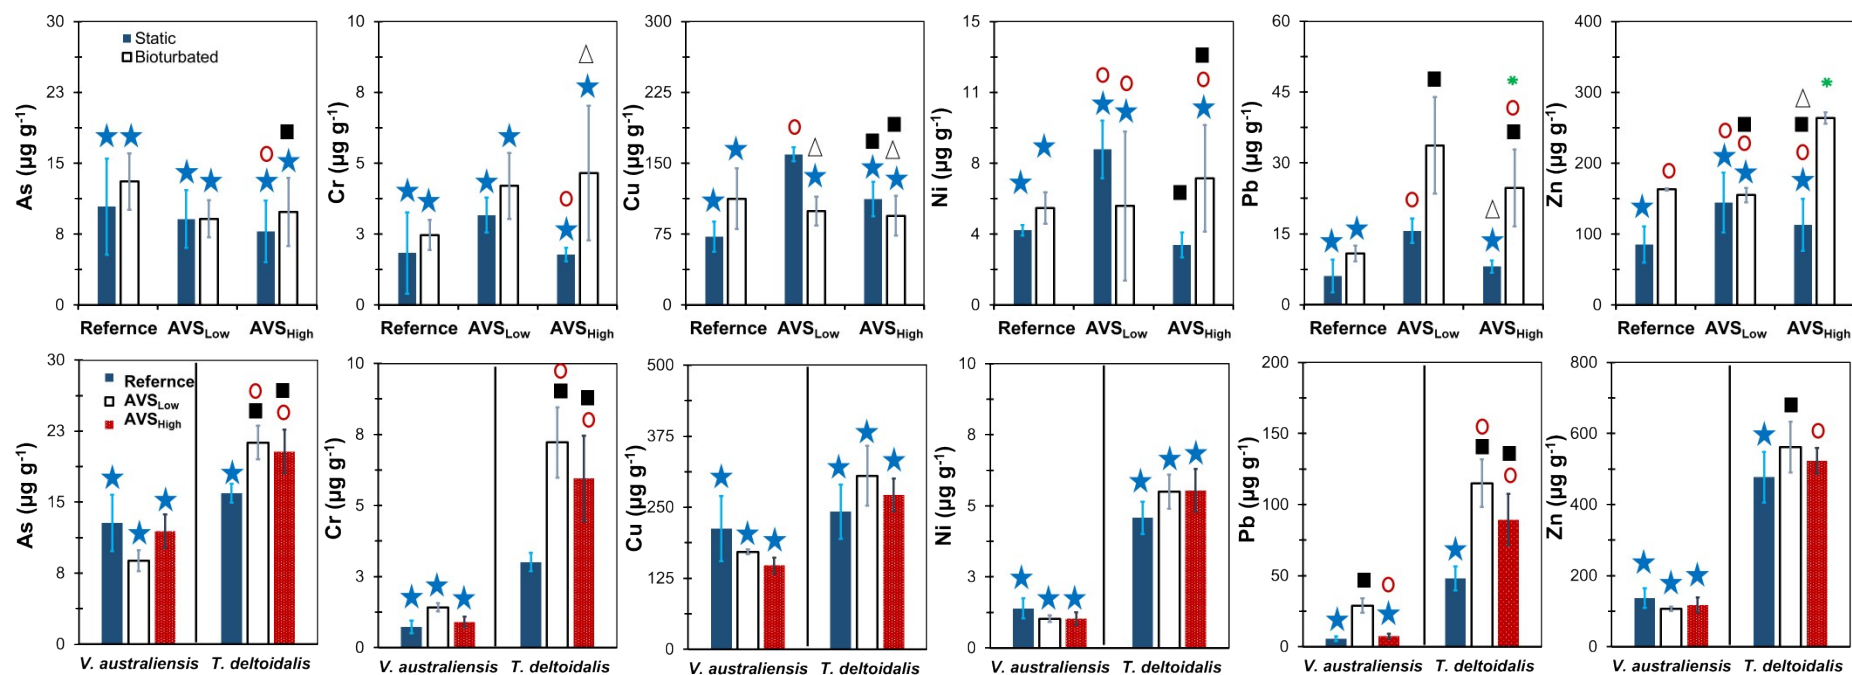

67

68 **Figure S2.** Metal accumulation data for *M. plumulosa* (top row) and bioturbators (bottom row) *V. australiensis* and *T. deltoidalis*. Reference = toxicity-control sediment,  
 69 AVS<sub>Low</sub> = metal- contaminated sediment, AVS<sub>High</sub> = sulfidic metal-contaminated sediment. All data are mean  $\pm$  SE (n=3). Different symbols indicate statistical differences  
 70 between treatments ( $p < 0.05$ ).

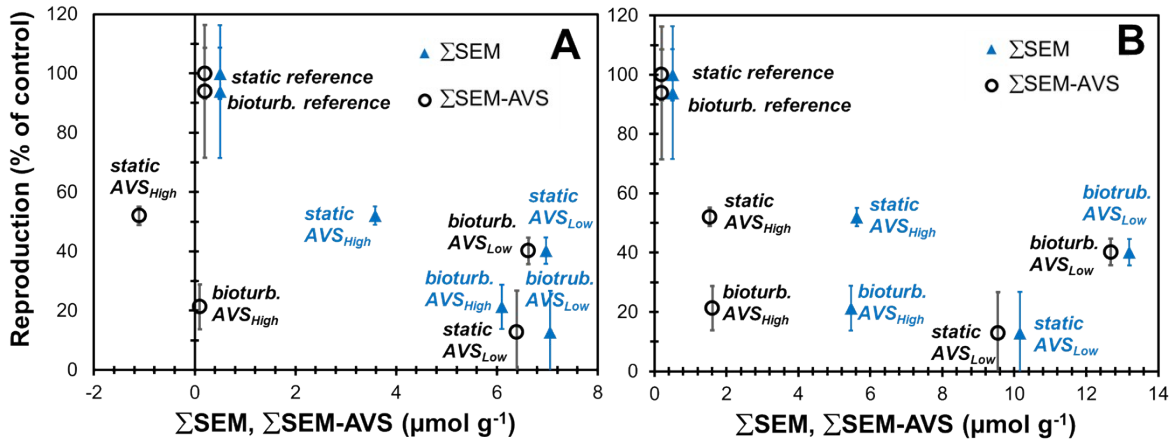

71

72 **Figure S3.** Relationship between sediment  $\Sigma$ SEM (blue triangles) and  $\Sigma$ SEM-AVS (open black circles)  
 73 concentrations: A at the end of the bioturbation phase (Day 0 of toxicity testing phase, (n=3, mean  $\pm$  SD)) and B:  
 74 during the toxicity testing phase (average of Days 0, 6 and 10, (n=9, mean  $\pm$  SD)) with reproductive toxicity to *M.*  
 75 *plumulosa* (n=3 mean  $\pm$  SE).

76

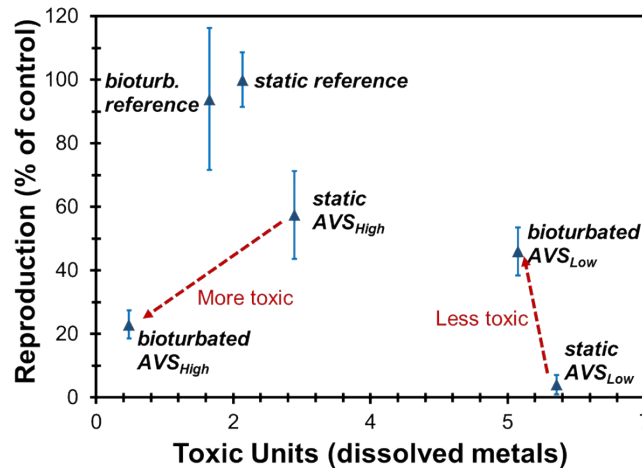

77

78 **Figure S4.** Relationship between water column dissolved metals (Cd, Cu, Ni, Pb and Zn) expressed as a toxic  
 79 units (TUs) throughout the toxicity test phase and reproductive toxicity in *M. plumulosa* (n=3 mean  $\pm$  SE). TU =  
 80  $\Sigma$  [dM]/WQGV, where dM = Cd, Cu, Ni, Pb, and Zn. Reference = toxicity-control sediment,  $AVS_{Low}$ = metal-  
 81 contaminated sediment,  $AVS_{High}$ = sulfidic metal-contaminated sediment.

82

83 Explanation for Figure S4:

84 A toxic unit (TU) approach based on water chemistry was used to assist in delineating relationships  
 85 between dissolved metal (Cr, Cu, Ni, Pb, Zn) exposures and observed toxicity (Figure S4 of the SI). As  
 86 expected for the  $AVS_{Low}$  sediment, lower toxicity in the *bioturbated*  $AVS_{Low}$  treatment corresponded  
 87 with slightly lower TU (TU= 5.4) than in the undisturbed *static*  $AVS_{Low}$  (TU= 5.9) sediment. Conversely,  
 88 the *static*  $AVS_{High}$  treatment was less toxic with higher TU (TU= 2.5), whereas the *bioturbated*  $AVS_{High}$   
 89 treatment was significantly more toxic with lower TU (TU= 0.4) than the *static*  $AVS_{Low}$  treatment. These  
 90 predictions do not match the observed toxicity, and therefore correspond with the observations from  
 91 the dissolved metal chemistry and suggests that perhaps bulk water samples were not adequate for  
 92 predicting exposure and/or toxic effects.

93
